# 1 Honest cues contribute to male choice for 2 female guarding in a herbivorous spider 3 mite 4

5 Steven F. Goossens<sup>1\*</sup>, Frederik Mortier<sup>1</sup>, Thomas Parmentier<sup>1,3</sup>, Femke Batsleer<sup>1</sup>, Thomas Van  
6 Leeuwen<sup>2</sup>, Nicky Wybouw<sup>1</sup>, Dries Bonte<sup>1</sup>

7 1. Ghent University, Terrestrial Ecology Unit, Department of Biology, K.L. Ledeganckstraat 35,  
8 9000 Ghent, Belgium

9 2. Ghent University, Laboratory of Agrozoology, Department of Plants and Crops, Coupure Links  
10 653, 9000 Ghent, Belgium

11 3. University of Namur, Research Unit of Environmental and Evolutionary Biology, Namur  
12 Institute of Complex Systems, and Institute of Life, Earth, and the Environment, Rue de Bruxelles 61,  
13 5000 Namur, Belgium

14

15 \*: corresponding author: [stevenf.goossens@ugent.be](mailto:stevenf.goossens@ugent.be)

## 16 Abstract

17 Mate choice is a wide-spread phenomenon with important effects on ecological and evolutionary  
18 dynamics of successive generations. Increasing evidence shows that males can choose females if  
19 females vary in quality and these mating choices can strongly impact fitness. In the herbivorous spider  
20 mite *Tetranychus urticae* males engage in precopulatory mate guarding of quiescent females, and it is  
21 known that females vary in their time to sexual maturity and fecundity. However, our understanding  
22 of how males maximize their reproductive success and which female phenotypic traits are important  
23 cues for their mating decisions are still limited. In many arthropod species, female body size and  
24 pheromones are well known proxies for fecundity. These traits—and thus possibly male mating  
25 decisions—are however sensitive to environmental (dietary) stress. By allowing males to freely choose  
26 amongst many (synchronized) females in a controlled semi natural environment, we found that  
27 guarded females have a higher fecundity and are closer to sexual maturity than non-guarded females.  
28 Despite the fact that female body size was positively correlated with fecundity and significantly  
29 influenced by the environment, males did not discriminate on body size nor did we find evidence that  
30 they used other cues like cuticular pheromones or copying behavior (social cues). In conclusion we  
31 were able to show male mate preference for females that are closer to sexual maturity and have higher  
32 fecundity, but we were unable to identify the female traits that signal this information

33

## 34 Introduction

35 In animals, mate choice can be defined as the specific behavior by which the quality of potential mates  
36 is assessed before copulation or fertilization (Bateson, 1983; Edward, 2014). The paradigm that  
37 females are a limiting factor in animal reproduction because of costly eggs (Bateman, 1948) is an  
38 erroneous simplification of complex eco-evolutionary processes (Edward & Chapman, 2011; Tang-  
39 Martínez, 2016). Males of many animal species provide nuptial gifts, invest in lengthy courtship or  
40 mate guarding, further reducing the number of future copulations (Kvarnemo & Simmons, 1998;  
41 Vahed, 1998; Byrne & Rice, 2006; Han & Jablonski, 2010; Papadopoulos et al., 2010; Oku, 2014). Such  
42 investment costs for males, favor male choosiness if female quality varies and this quality can be  
43 perceived by the males (Snowdon, 1997; Bonduriansky, 2001; Edward & Chapman, 2011; Hare &  
44 Simmons, 2019).

45 In many arthropods it is known that males prefer females with larger body size as it is associated with  
46 larger reproductive output (Honěk, 1993; Calvo & Molina, 2005; Drapela et al., 2013). Males use visual  
47 and/or tactile cues to evaluate female body size and adjust their mating behavior according to the  
48 estimated size (Gage, 1998; Byrne & Rice, 2006; Chenoweth et al., 2007). Chemical signals such as  
49 pheromones can signal mating status and sexual maturity and equally provide honest information  
50 about female fecundity (Gaskett, 2007; Steiger & Stökl, 2014). These chemical cues may be  
51 differentially perceived depending on environmental conditions or distances from the potential mate  
52 (Bel-Venner et al., 2008). Besides gathering information about female quality directly, individuals may  
53 use social cues about potential mates as well. In this way, males can save time and energy by copying  
54 other individuals instead of thoroughly investigating the female quality themselves (Scauzillo & Ferkin,  
55 2019). Such a choice copying is considered to be context-dependent (Witte, Kniel, & Kureck, 2015),  
56 leading to contrasting results in series of empirical studies with respect to the strength and reliability  
57 of female signals (Gaskett, 2007). This is because strong manipulative studies have their own  
58 constraints and introduce biasing effects, rendering insights on the relevance and significance of mate  
59 choice elusive. Many choice test, for instance, overestimated mate preference (Dougherty & Shuker,  
60 2015).

61 We here aimed to avoid such constraints by testing mate selection in the two-spotted spider mite  
62 *Tetranychus urticae* under semi-natural conditions. *T. urticae* guard females that are about to molt to  
63 the adult stage (the quiescent female deutonymphs, or teliochrysalids). This guarding behavior allows  
64 males to secure the first mating opportunity and fertilize all the eggs of the guarded female (commonly  
65 referred as first sperm precedence; (Helle, 1967). Guarding is time-consuming and exposes spider mite  
66 males to predators, diseases and competitors (Alcock, 1994; Lima, 1998; Oku & Yano, 2008; Oku, 2009)  
67 and induces aggressive interactions among males (Potter, Wrensch, & Johnston, 1976), potentially  
68 result in wounding or even death (personal observations SG, NW; Potter, Wrensch, & Johnston, 1976).  
69 Therefore, males employing precopulatory mate guarding and fighting are anticipated to maximize  
70 their reproductive success by choosing the most fit females to guard. Males tend to select  
71 teliochrysalids that are close to emerge hereby minimizing the time invested per copulation (Parker,  
72 1974; Everson & Addicott, 1982). Despite this intuitive appeal of the time minimization hypothesis,  
73 later studies generated inconsistent results in *T. urticae* (Saito, 2010). These non-consistent results  
74 may result from varying environmental conditions especially the population density and sex-ratio, as  
75 this directly affects the level of mate competition (Macke et al., 2012).

76 Consistent with studies that uncovered a limited visual capacity of *T. urticae* (Naegele, McEnroe, &  
77 Soans, 1966; W. D. McEnroe & Dronka, 1966; William D. McEnroe, 1969), chemical sensing of foliar  
78 structures and webbing have been implicated as important determinants in male searching behavior  
79 for female teliochrysalids (Cone et al., 1971; Penman & Cone, 1972). Some evidence on the importance

80 of sex-pheromones has been provided in the 70ies of the previous century (Regev & Cone, 1975, 1976,  
81 1980), but their effective function in signaling remains elusive and no volatile pheromones have been  
82 discovered that are known to contain information about the condition or quality of potential partners  
83 (Royalty, Phelan, & Hall, 1993; Oku, 2014; Oku et al., 2015). There is some evidence of mate choice  
84 copying behavior in spider mites, with males preferring guarded over solitary females, most likely  
85 because the former invest into a higher pheromone production (Oku & Shimoda, 2013). Paradoxically,  
86 solitary females had the highest fecundity, most likely because of being released from this costly  
87 pheromone production. This mating strategy therefore increases female fitness by attracting the most  
88 fit males, but not male fitness (Biernaskie, Grafen, & Perry, 2014). Given the fast resource exploitation  
89 dynamics of the species, dispersal rates (and therefore the potential to monopolize new resources) are  
90 an important fitness-related measure as well (Massol, Calcagno, & Massol, 2009; Bonte & Dahirel,  
91 2017).

92 In this study, we observed mate guarding behavior of *T. urticae* under low and high population density  
93 in semi-natural conditions where the males can assess many different females before their mate  
94 choice. This allowed us to separate guarded and unguarded females under the different environmental  
95 conditions, and enables us to document putative alternative mating tactics of males. There is some  
96 evidence that body size is positively correlated with fecundity in this species (Li & Zhang, 2018). It has  
97 been shown that the CHC profiles of several insect species serve as indicators of female fertility as well  
98 (Thomas & Simmons, 2010; Bilen et al., 2013; Smith & Liebig, 2017), and that they may even be  
99 genetically correlated with fecundity (Berson & Simmons, 2019). In contrast to volatile pheromones,  
100 such CHC's have not been investigated in spider mites. Lastly, we tested if males copy conspecific males  
101 by evaluating the spatial configuration of guarded females on the total leaf. We suspect that copying  
102 behavior and possible clustering of teliochrysalids could result in aggregations of guarded and  
103 unguarded females. We evaluated potential fitness maximization, and therefore the honesty of cues,  
104 by quantifying life history traits of all guarded and non-guarded females.

105

## 106 Materials and Methods

### 107 Mite husbandry

108 The *T. urticae* strain Lede was used in this study and is derived from the reference laboratory strain LS-  
109 VL that was originally collected from roses in Ghent, Belgium (Van Leeuwen, Stillatus, & Tirry, 2004).  
110 Mites of the stock population were reared on potted bean plants (*Phaseolus vulgaris* L. cv. 'Prelude')  
111 in a climate-controlled room at  $26 \pm 0.5$  C, 60 % RH and 16/8 h (L/D) photoperiod. To create high (HD)  
112 and low (LD) densities, 40 (HD) and 10 (LD) adult females were randomly collected from the stock  
113 populations and transferred to leaf discs of  $3.5 \times 4.5$  cm<sup>2</sup>, (freshly cut from 2-week-old plants) on wet  
114 cotton in an incubator (27 °C, 16:8 LD). Females were subsequently allowed to oviposit for 24 hours.  
115 On the 40 HD leaf discs there were an average of 15 eggs/cm<sup>2</sup>, whereas 40 LD leaf discs held on average  
116 2 eggs/cm<sup>2</sup>. After 7 days left to develop in an incubator (37°C, 16:8 LD) most of the female mites were  
117 in the teleochrysalids stage (nymphal females in their final quiescent stage). On these leaf discs with  
118 females in the teleochrysalids stage, most male spider mites already reached adult hood and are  
119 present in a ratio of 1:3 (one male for every 3 females). Some males guard quiescent deutonymph  
120 females, the stage immediately before adult emergence and sexual maturation. The duration of the  
121 quiescent deutonymph stage is ca. 1 day at 27°C with a L16:D8 photoperiod (Kabiri, Saboori, &  
122 Allahyari, 2012). Immediately after emergence the guarding male quickly copulates with the adult  
123 female. The experiments were conducted in 2 batches, with a total of 35 HD,LD plates in the first set  
124 ad 35 HD, LD plates in the second experiment.

125 We let the males choose freely among many different teleochrysalids and subsequently measured  
126 their spatial clustering. Fitness related traits were measured by subsequently transferring individual  
127 guarded and unguarded teleochrysalids to bean leaf discs ( $2 \times 2$  cm<sup>2</sup>) that were connected by parafilm  
128 bridges on top of moist cotton and were lined with 2-mm-wide strips of moist tissue paper. For both  
129 the HD and LD treatments, 30 guarded and unguarded teliochrysalids were selected from random  
130 plates in both experiments, making a total of 240 individuals measured for body size, fecundity,  
131 survival and dispersal. After measuring the teliochrysalids body size the guarding male was introduced  
132 on the leaf disc to fertilize the emerging female, a random male was introduced on leaves of non-  
133 guarded teleochrysalids. In the second experiment no males were introduced on the leaf disc and thus  
134 all females are not mated. Time till emergence was tested for mites from the two batches of  
135 experiments, with respectively 38, 29 and 26 guarded females and 35,27 and 28 unguarded females  
136 for both experiments. Teleochrysalid cuticular chemical profiles were quantified from pools of 30  
137 guarded and unguarded teleochrysalids from experiment 1.

138

### 139 Spatial clustering of guarded females

140 We allowed all males from the age-synchronized populations to choose female teleochrysalids on the  
141 leaf discs and subsequently analyzed the spatial configuration of guarding males. If males were  
142 attracted by other males (through social cues), we expected a clustering of guarded teleochrysalids on  
143 the bean leaves.

144 To obtain the spatial configuration of guarding males, the seven day old leaves were photographed in  
145 a standard way of six leaves (3 HD and 3 LD). The positions of the guarded and unguarded  
146 teleochrysalids were marked using ImageJ (Schneider, Rasband, & Eliceiri, 2012) and were confirmed  
147 by manual inspection under a stereo microscope. After one hour, leaf discs were screened again, which  
148 confirmed that all females marked as guarded had remained guarded. The spatial positions were  
149 analyzed as point patterns with Spatstat (Baddeley, Rubak, & Turner, 2015). To analyze if guarded  
150 females were more clustered in the point pattern, the mark equality function is calculated for the six  
151 patterns. This function gives the probability that two points have the same mark (guarded or  
152 unguarded) when separated by a distance  $r$ . If guarded females are more clustered, this function would  
153 be higher at small distances than complete spatial randomness (horizontal line at value 1). Acceptance

154 regions were drawn around the complete spatial random line using Monte Carlo simulation envelopes  
155 (n=500) to infer if the mark equality functions differ from complete spatial randomness.

156

## 157 **Fitness related traits in guarded and unguarded mites**

158 *Body size*: we measured the teleochrysalid abdomen surface area (Troscianko, 2014) from high-  
159 resolution photos (Leica M50, 5 MP HD Microscope Camera Leica MC170 HD).

160 *Fecundity*: we tested whether male guarding was related to female reproductive performance by  
161 quantifying the number of offspring from a single females after 12 days (Wybouw et al., 2015).

162 Body size and fecundity were analysed by means of a linear mixed effect (lme) model in R using the  
163 package 'lme4'. Mother density treatment, guarding status and their interaction were used a  
164 explanatory variables. We also included the iteration of the experiment as a variable intercept. Post-  
165 hoc analysis was performed on the estimated marginal means of the lme using the 'emmeans' package.

166 *Survival*: female mortality was monitored during a period of 20 days. We fitted a mixed-effect Cox  
167 model of how female mortality in time depended on whether the female was guarded or not. Females  
168 that died in the first 24 minutes were omitted because early deaths are attributed to the experimental  
169 manipulation. The mixed-effect Cox model enabled us to control for the possible auxiliary effects that  
170 were present during the two repetitions by including it as a variable intercept. We verified the  
171 proportional hazard assumption on each experiment separately (Supplementary statistics ,2).

172 *Time till emergence*: We tested whether males could perceive time to emergence when deciding which  
173 female to guard. Teleochrysalids that were guarded or unguarded for at least one hour (see marking  
174 for the spatial analysis) were individually transferred to bean leaf square (4 x 4 cm<sup>2</sup>). The leaf was  
175 divided in two half's and guarded females were placed on one side and the unguarded on the other. A  
176 series of time laps pictures was taken (Leica M50, 5 MP HD Microscope Camera Leica MC170 HD) every  
177 10s for 24h. The pictures of the time laps were analyzed to determine the molting time of each guarded  
178 and unguarded female.

179 We fitted a mixed-effect Cox model of how female emergence in time depended on whether the  
180 female was guarded or not using the 'survival' and 'coxme' packages (Therneau et al., 2021). The  
181 mixed-effect Cox model enabled us to control for the possible auxiliary effects that were present  
182 during the three repetitions by including it as a variable intercept. Data from the first experiment  
183 violated the proportional hazard assumption and were excluded from the formal analyses (but  
184 provided in supplement statistics,1a,1b).

185 *Dispersal*: We quantified dispersal by the movement of mites across parafilm bridges to adjacent leaf  
186 discs (Dahirel et al., 2019) for adult females in the first batch of experiments. Spider mite movements  
187 were monitored 4 times/day. We constructed a Kaplan-Meier model of how dispersal in time  
188 depended on whether females were previously guarded or not and on their density during testing. The  
189 survival and dispersal analyses were conducted with the 'survival' and 'coxme' packages (Therneau et  
190 al., 2021).

191

## 192 **Chemical profile of guarded and non-guarded females**

193 Here, we wanted to test whether the teleochrysalid cuticular chemical profile affected male guarding  
194 behavior. We transferred pools of 30 guarded and unguarded teleochrysalids with hexane-cleaned  
195 brushes to separate 2-mL glass vials in five replicates (Sigma-Aldrich). In addition, we also transferred  
196 pools of 30 adult males to separate 2-mL vials in two replicates. The teleochrysalids and adult males  
197 were frozen and kept at -21 °C until solvent extraction and GCMS analysis. We extracted the  
198 cuticular compounds for 10 min in 2-mL vials capped with a PTFE septum (Sigma-Aldrich) in 20 µL of

199 hexane (HPLC grade, Sigma-Aldrich). The hexane extract was transferred to another vial. Samples  
200 were left to evaporate at room temperature in a laminar fume hood and stored at  $-21^{\circ}\text{C}$  prior to  
201 analysis. Samples were diluted again in  $20\text{-}\mu\text{L}$  hexane. We injected  $2\ \mu\text{L}$  of each hexane extract into a  
202 Thermo GC (Trace 1300 series) coupled with a MS (ISQ series,  $-70\ \text{eV}$ , electron impact ionization) and  
203 equipped with a Restek RXi-5sil MS column ( $20\ \text{m} \times 0.18\ \text{mm} \times 0.18\ \mu\text{m}$ ). Extraction, identification  
204 and quantification of the CHCs was conducted as described in (Parmentier et al., 2018).

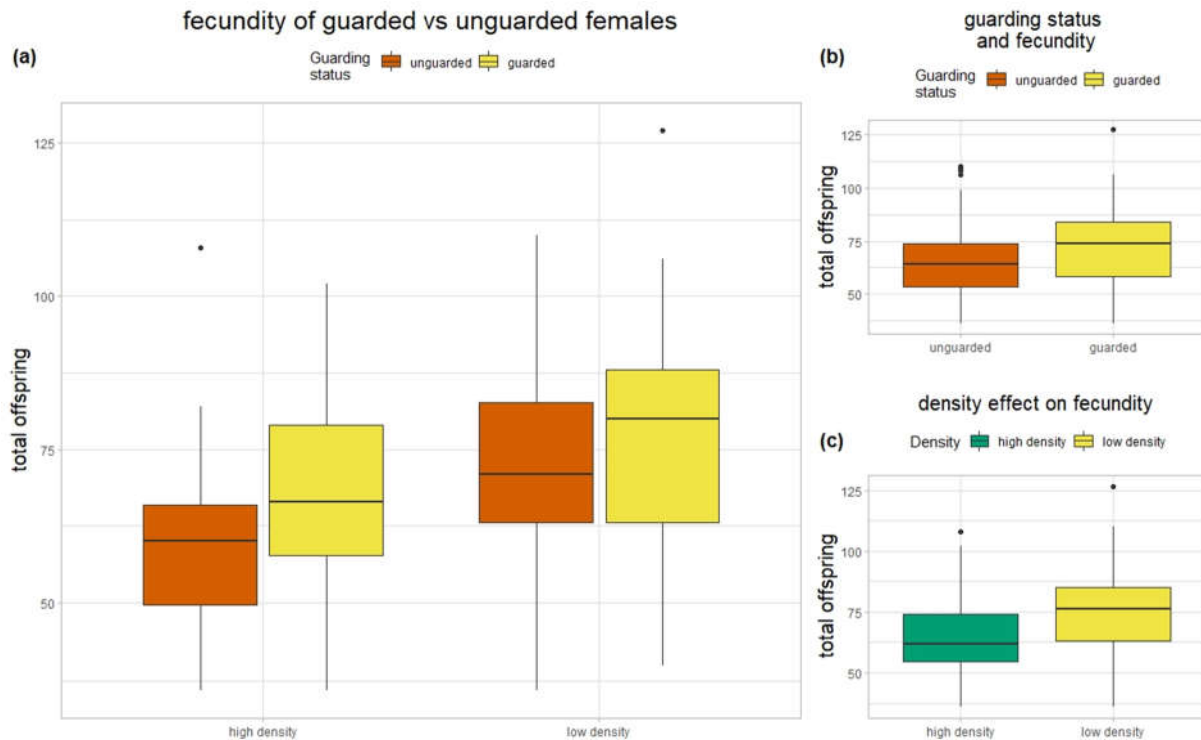

205

206 **Figure 1:** Fecundity of guarded females and unguarded females in high and low density plots. (a) fecundity (total offspring)  
207 of the guarded females is significantly higher in high (food stress) and low density conditions. (b) Total difference in  
208 fecundity of unguarded vs guarded females. (c) Total difference in fecundity between high density (food stress) and  
209 low density conditions.

## 210 Results

### 211 Spatial clustering of guarded females

212 Mark equality plots of the three HD and three LD point patterns showed that guarded (or unguarded)  
213 females are not more clustered together than expected under complete spatial randomness  
214 (Supplementary fig. S1).

### 215 Fitness related traits in guarded and unguarded mites

216 Female body size did not differ significantly between the guarding status ( $247 \pm 14.6\ \mu\text{m}$  for unguarded  
217 individuals,  $243 \pm 14.6\ \mu\text{m}$  for guarded individuals, difference:  $3.51\ \mu\text{m}$ ,  $p = 0.1688$ , supplementary fig.  
218 S2). As expected from the more stressful high density treatment, female mites exposed to a high  
219 density were significantly smaller ( $t(\text{density}) = 4.692$ ,  $p < 0.0001$ ) than those mites kept in low density  
220 ( $237 \pm 14.5\ \mu\text{m}$  for HD individuals versus  $253 \pm 14.6\ \mu\text{m}$  for LD individuals, difference:  $-16.1\ \mu\text{m}$ ,  $p < 0.0001$ ,  
221 Supplementary fig. S2). The large difference in body size between HD and LD mites and the variation  
222 within the treatments shows that a variation in body size can be found, but in our experiment males  
223 did not prefer larger females.

224 Body size was positively correlated to fecundity ( $r = 0.30$ ;  $p = 0.00018$ , Supplementary fig. S3). The total  
225 number of offspring (fig. 1, panel a) differed between density treatments and between the guarding

226 status of the female. Females were estimated to produce  $63.2 \pm 3.78$  offspring on high density leaves  
227 versus  $73.1 \pm 3.82$  offspring on low density leaves (difference:  $-9.98$ ,  $p < 0.0001$ , fig. 1, panel c).  
228 Furthermore, guarded females produced  $71.6 \pm 3.78$  offspring, unguarded females  $64.7 \pm 3.79$  offspring  
229 after 12 days (difference:  $6.83$ ,  $p = 0.0014$ , Fig. 1, panel b). We did not observe a significant interaction  
230 effect between mother density and guarding.

231 Over both analyzed experiments, guarded teliochrysalids molted to adult females with a probability  
232 that was 1.82 higher than that of unguarded females (Cox mixed-effects model,  $\exp(\text{coeff}) = 1.82$ ,  
233  $p = 0.0023$ ; Fig 2). Before 900 min (15h) we see at each time point that a higher proportion of guarded  
234 females emerged but after 900 min this levels out. Males seem therefore able to detect females that  
235 will emerge from their final ecdysis within 900 min.

236 The Kaplan–Meier estimator shows that there were no differences in survival ( $p = 0.48$ ), or dispersal  
237 ( $p = 0.75$ ) between guarded and non-guarded females (see supplement statistics, 2a, 2b, 3).

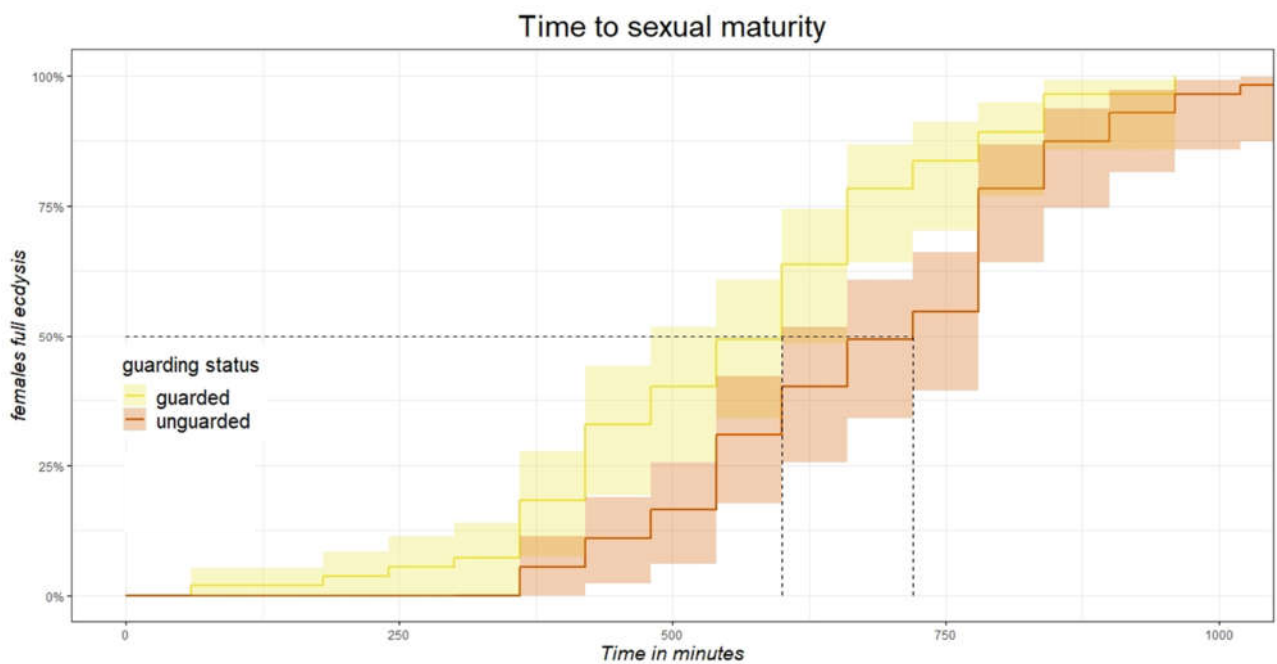

238

239 **Figure 2** : Time to event (sexual maturity) plot of guarded and unguarded females. Guarded females emerge faster from  
240 there resting state than unguarded females with the largest differences at the early time points (faster emergence) and less  
241 difference past 800 minutes (33h).

242

### 243 Chemical profile of guarded and non-guarded females

244 The cuticular hydrocarbons of the spider mites constituted a homologous series of saturated straight  
245 chain alkanes from n-C22 to n-C33 (supplementary Figures, S4). There were quantitative differences in  
246 the CHC composition between males and females, males formed a separate group in an nMDS plot  
247 (Permanova—adonis, 999 permutations, Pseudo-F = 7.77,  $R^2 = 0.6334$ ,  $P = 0.008$ ). but guarded females  
248 could not be separated graphically in an nMDS plot (supplementary Figures, S4). Consequently, no  
249 effect of treatment group on female CHC composition could be demonstrated (Permanova—ADONIS,  
250 999 permutations, Pseudo-F = 1.04,  $R^2 = 0.112$ ,  $P = 0.439$ ).

251

## 252 Discussion

253 In this study, integrated experiments show that *T. urticae* males preferred to guard females that  
254 differed in sexual maturation and fecundity from unguarded females. Contrary to our hypotheses we  
255 did not find any evidence that males use cuticular hydrocarbons, body size or social cues in sexual  
256 selection.

257 As in other species (e.g., amphipods; Dick & Elwood, 1990), spider mite males likely rely on cues that  
258 provide information on both fecundity and time till maturity to enhance their mating success.  
259 Alternatively, mate guarding could shorten the female quiescence, so advance maturation in females  
260 rendering the presence of males rather the cause than the consequence of life history changes. Indeed,  
261 as for amphipods (Ward, 1984), spider mites females have been shown to delay molt in absence of  
262 mating partners (Oku, 2016).

263 We found that guarded females were more likely to be closer to molting than unguarded females with  
264 indications that small differences in molting in the last 15h to molting are detected. Conversely, Oku  
265 & Saito (2014) also found that males preferred females close to molting but could only discriminate if  
266 the time to molting was more than 22h apart. This can be explained by the fact that males in our  
267 experiment could assess all possible options, and reject females closer to maturation in favor of  
268 females that have the energy and resources to lay more eggs but take a bit longer to molt. Also some  
269 females close to maturation could already be guarded by other males, so males have to waste time  
270 and energy for male combat to take over the most optimal females or search for the next best female  
271 that is not guarded. By using both the time they have to invest in guarding and female fecundity, males  
272 can maximize their reproductive gains per unit time of investment. It is known that males usually do  
273 not spend much time in inter-male conflicts (<5s), with the approaching male being attacked and  
274 driven off by a guarding male in most cases (Royalty, Phelan, & Hall, 1993). In our experiment we also  
275 found that once males become arrested near a female, they tend to commit to guard that female until  
276 they mate with the guarded female. Alternatively, males can also vary in their preference and ability  
277 with no single female “type” favored by all males. It would therefore be interesting to study male traits  
278 in association with their choice and competition for specific female (traits). Moreover, we argue that  
279 male mate choice may be a threshold response where male investment is conditional to the available  
280 energy budget, density of females, other males, the time until the female reaches sexual maturity and  
281 total number of offspring per female.

282 The positive correlation between body size of the teleochrysalids and fecundity was rather modest  
283 (0.3) and males in our experiment did not prefer or could not distinguish the larger females. We did  
284 find that in the lower stress condition (low density), females were significantly larger than females  
285 raised in a stressful environment (high density). However, male choice for body size was not influenced  
286 by the environment. Similarly, females in the low stress conditions had significantly more offspring  
287 than the females in the stressful environment. Although males generally prefer larger females in many  
288 insects and spiders (e.g., Saeki, Kruse, & Switzer, 2005), females may also “chose” to allocate resources  
289 to reproduction instead of other traits such as growth and have therefore body size decoupled from  
290 fecundity. In these, large body size is not selected for (e.g., Wolz et al., 2020) or even counter-selected  
291 (e.g., Klingenberg & Spence, 1997).

292 A positive relation between fecundity and cuticular hydrocarbons (CHC's) is found in many insects and  
293 quantitative and qualitative differences in CHC's are important in for partner choice in spiders (Gaskett,  
294 2007; Chung & Carroll, 2015; Berson & Simmons, 2019). In spider mites, volatile pheromones have long  
295 been investigated as an attractant for male spider mites, with sometimes contradicting results (Oku,  
296 2014). Even though it is possible that males are attracted by volatile pheromones, it seems unlikely  
297 that these volatiles found in spider mites so far provide information about the quality of the female  
298 (Saito, 2010; Oku et al., 2015). As in spiders we suspected that airborne sex pheromones typically  
299 attract males, but rarely elicit courtship (Gaskett, 2007). In contrast CHC's not only provide males with  
300 information about female fecundity but in many species their composition also changes with sexual



301 maturation (Ala-Honkola et al., 2020). Although previous studies used proxies to investigate the  
302 attraction of male spider mites to CHC's and distinguish these from the attraction to volatiles  
303 (Rodrigues et al., 2017), no studies on their role as a possible cue for female quality exist. We found  
304 that cuticular CHC's composition of *T. urticae* consists of a homologous series of saturated straight  
305 chain alkanes from c22 to c33. A similar result of CHC's arranged in a series of straight chain alkanes  
306 was found in oribatid mites (Acari: Oribatida) (Rasputnig et al., 2008). We could not find any differences  
307 in quantity nor quality of the CHC's between guarded and unguarded females. As a consequence of  
308 small sizes of the spider mites, and thus, minute amounts of hydrocarbons, a high number of  
309 individuals was necessary to prepare crude extracts with detectable alkane-profiles. This could also  
310 mean that a more subtle signal of female quality might not be noticed by our methods as we cannot  
311 evaluate every female separately. Alternatively, pheromones signaling female quality and sexual  
312 maturation could also be present in the webbing of the resting females as is known from spiders  
313 (Baruffaldi et al., 2010; C. Scott et al., 2018). Although it is suggested that spider mites can use silk as  
314 a movement cue, nothing is known about what information is present in the silk (Penman & Cone,  
315 1974). For instance during web production female spider can deposit large amounts (up to 5µg/web)  
316 of pheromones in their silk, providing possible mates with cues about their condition (Schulz & Toft,  
317 1993; Gaskett, 2007).

318 Finally, we did not find any evidence that males use social cues in guarding behavior. Although there  
319 were multiple teliochrysalids close to each other, mostly only one or two of these were guarded. The  
320 use of social information in mating is not uncommon in spiders and insects (Mery et al., 2009; Fowler-  
321 Finn et al., 2015; C. E. Scott, McCann, & Andrade, 2019). Relying on social information, mate-choice  
322 copying, and thus aggregating close to deceptive females, is costly as it increases conflict and direct  
323 mortality (Potter, Wrensch, & Johnston, 1976). Hence, male mate-choice copying behavior is only  
324 expected to occur when searching (time) costs are high (Real 1990). In spider mites, searching times  
325 are likely not very high as mating partners are quite densely distributed. This contrasts strongly with  
326 systems where such behavior was observed, e.g. in spiders where mate searching can have high  
327 mortality rates, favoring efficient detection of and movement towards females (C. E. Scott, McCann, &  
328 Andrade, 2019). Our results indicate that males avoid to guard females that are attended by a number  
329 of males. We cannot rule out that there was conflict between males before they settled in their final  
330 choice, but in all cases there were still more females unguarded than guarded, leaving ample variation.  
331 We neither found any adjustment of these mate selection strategies over the two density treatments,  
332 despite changes in phenotypes.

333 Although previous research found that spiders mites changed their guarding behavior in response to  
334 density we did not find any indication that males changed their guarding behavior (Oku, 2009). We did  
335 find that the body size and fecundity differed for the females between our density treatments  
336 indicating an effect of the stressful conditions. Nevertheless it is possible that our 'high density' was  
337 not high enough for the males to alter their guarding behavior.

338 In conclusion, we here demonstrated non-random mate selection of spider mites in semi-natural  
339 settings. Our work complements earlier work using choice experiments and shows that even in  
340 conditions where multiple cues are present, that sexual selection is based on honest cues, i.e., that  
341 males select females directly providing largest fitness benefits by selecting females that minimize time  
342 costs (guarding time) as well as maximizing reproduction. This signaling appears to be based on other  
343 cues than cuticular hydrocarbons, body size or social information.

344

345

## 346 Funding and Acknowledgements

347

348 Steven F. Goossens is funded by Research Foundation - Flanders (FWO) (FWOproject G018017N).  
349 Frederik Mortier and Femke Batsleer are funded by FWO. NW was supported by a BOF post-doctoral  
350 fellowship (Ghent University, 01P03420)

351 We thank the bachelor students Ditte De Waele and Lennard Dekeukeleire and lab assistant Ruben  
352 Claus for their contribution in gathering the data for this research.

353 Author contributions: The study was initially conceptualized by S.G. and developed with input from  
354 D.B. and T.P. .S.G developed the experiments and collected data. T.P. extracted the cuticular  
355 hydrocarbons (CHC's) and conducted gas chromatography and subsequent identification and statistical  
356 analysis of the CHC's. S.G and F.M. performed the statistical analysis of life history traits and body size.  
357 FB performed the spatial analysis. S.G. and N.W. drafted the manuscript. All authors proofread the  
358 manuscript and made valuable contributions.

359

360 Conflict of interest: None declared.

361

## 362 References

363 Ala-Honkola, O., Kauranen, H., Tyukmaeva, V., Boetzel, F.A., Hoikkala, A., & Schmitt, T. (2020).

364 Diapause affects cuticular hydrocarbon composition and mating behavior of both sexes in

365 *Drosophila montana*— *Insect Sci.* 27: 304–316.

366 Alcock, J. (1994). Postinsemination Associations Between Males and Females in Insects: The Mate-

367 Guarding Hypothesis— *Annu. Rev. Entomol.* 39: 1–21.

368 Baddeley, A., Rubak, E., & Turner, R. (2015). *Spatial Point Patterns Methodology and Applications*

369 With R. Taylor and Francis.

370 Baruffaldi, L., Costa, F.G., Rodriguez, A., & Gonzalez, A. (2010). *Chemical Communication in*

371 *Schizocosa malitiosa*: Evidence of a Female Contact Sex Pheromone and Persistence in the

372 Field— *J. Chem. Ecol.* 36: 759–767.

373 Bateman, A.J. (1948). Intra-sexual selection in *Drosophila*— *Heredity* 2: 349–368.

374 Bateson, P. (1983). *Mate Choice*. Cambridge University Press.

375 Bel-Venner, M. c, Dray, S., Allainé, D., Menu, F., & Venner, S. (2008). Unexpected male choosiness for

376 mates in a spider— *Proc. R. Soc. B Biol. Sci.* 275: 77–82.

377 Berson, J.D. & Simmons, L.W. (2019). Female cuticular hydrocarbons can signal indirect fecundity

378 benefits in an insect— *Evolution* 73: 982–989.

- 379 Biernaskie, J.M., Grafen, A., & Perry, J.C. (2014). The evolution of index signals to avoid the cost of  
380 dishonesty— Proc. Biol. Sci. 281: 20140876.
- 381 Bilen, J., Atallah, J., Azanchi, R., Levine, J.D., & Riddiford, L.M. (2013). Regulation of onset of female  
382 mating and sex pheromone production by juvenile hormone in *Drosophila melanogaster*—  
383 Proc. Natl. Acad. Sci. 110: 18321–18326.
- 384 Bonduriansky, R. (2001). The evolution of male mate choice in insects: a synthesis of ideas and  
385 evidence— Biol. Rev. Camb. Philos. Soc. 76: 305–339.
- 386 Bonte, D. & Dahrenel, M. (2017). Dispersal: a central and independent trait in life history— Oikos 126:  
387 472–479.
- 388 Byrne, P.G. & Rice, W.R. (2006). Evidence for adaptive male mate choice in the fruit fly *Drosophila*  
389 *melanogaster*— Proc. R. Soc. B-Biol. Sci. 273: 917–922.
- 390 Calvo, D. & Molina, J.M. (2005). Fecundity–Body Size Relationship and Other Reproductive Aspects of  
391 *Streblote panda* (Lepidoptera: Lasiocampidae)— Ann. Entomol. Soc. Am. 98: 191–196.
- 392 Chenoweth, S.F., Petfield, D., Doughty, P., & Blows, M.W. (2007). Male choice generates stabilizing  
393 sexual selection on a female fecundity correlate— J. Evol. Biol. 20: 1745–1750.
- 394 Chung, H. & Carroll, S.B. (2015). Wax, sex and the origin of species: Dual roles of insect cuticular  
395 hydrocarbons in adaptation and mating— BioEssays 37: 822–830.
- 396 Cone, W.W., McDonough, L.M., Maitlen, J.C., & Burdajewicz, S. (1971). Pheromone Studies of the  
397 Two spotted Spider Mite. 1. Evidence of a Sex Pheromone<sup>12</sup>— J. Econ. Entomol. 64: 355–358.
- 398 Dahrenel, M., Masier, S., Renault, D., & Bonte, D. (2019). The distinct phenotypic signatures of  
399 dispersal and stress in an arthropod model: from physiology to life history— J. Exp. Biol. 222.
- 400 Dick, J.T.A. & Elwood, R.W. (1990). Symmetrical assessment of female quality by male *Gammarus*  
401 *pulex* (Amphipoda) during struggles over precopula females— Anim. Behav. 40: 877–883.
- 402 Dougherty, L.R. & Shuker, D.M. (2015). The effect of experimental design on the measurement of  
403 mate choice: a meta-analysis— Behav. Ecol. 26: 311–319.

- 404 Drapela, T., Frank, T., Heer, X., Moser, D., & Zaller, J.G. (2013). Landscape structure affects activity  
405 density, body size and fecundity of *Pardosa* wolf spiders (Araneae: Lycosidae) in winter  
406 oilseed rape— EJE 108: 609–614.
- 407 Edward, D.A. (2014). The description of mate choice— Behav. Ecol. 10.
- 408 Edward, D.A. & Chapman, T. (2011). The evolution and significance of male mate choice— Trends Ecol.  
409 Evol. 26: 647–654.
- 410 Everson, P.R. & Addicott, J.F. (1982). Mate selection strategies by male mites in the absence of  
411 intersexual selection by females: a test of six hypotheses— Can. J. Zool. 60: 2729–2736.
- 412 Fowler-Finn, K.D., Sullivan-Beckers, L., Runck, A.M., & Hebets, E.A. (2015). The complexities of female  
413 mate choice and male polymorphisms: Elucidating the role of genetics, age, and mate-choice  
414 copying— Curr. Zool. 61: 1015–1035.
- 415 Gage, M.J.G. (1998). Influences of sex, size, and symmetry on ejaculate expenditure in a moth—  
416 Behav. Ecol. 9: 592–597.
- 417 Gaskett, A.C. (2007). Spider sex pheromones: emission, reception, structures, and functions— Biol.  
418 Rev. 82: 27–48.
- 419 Han, C.S. & Jablonski, P.G. (2010). Male water striders attract predators to intimidate females into  
420 copulation— Nat. Commun. 1: 52.
- 421 Hare, R.M. & Simmons, L.W. (2019). Sexual selection and its evolutionary consequences in female  
422 animals— Biol. Rev. 94: 929–956.
- 423 Helle, W. (1967). Fertilization in the Two-Spotted Spider Mite (*tetranychus Urticae*: Acari)— Entomol.  
424 Exp. Appl. 10: 103–110.
- 425 Honěk, A. (1993). Intraspecific Variation in Body Size and Fecundity in Insects: A General  
426 Relationship— Oikos 66: 483–492.
- 427 Kabiri, H., Saboori, A., & Allahyari, H. (2012). Impact of different cotton (*Gossypium* spp.) cultivars, as  
428 host plant, on development and fertility life-table parameters of *Tetranychus urticae* (Acari:  
429 Tetranychidae)— Int. J. Acarol. 38: 46–50.

- 430 Klingenberg, C.P. & Spence, J.R. (1997). On the role of body size for life-history evolution– Ecol.  
431 Entomol. 22: 55–68.
- 432 Kvarnemo, C. & Simmons, L.W. (1998). Male potential reproductive rate influences mate choice in a  
433 bushcricket– Anim. Behav. 55: 1499–1506.
- 434 Li, G.-Y. & Zhang, Z.-Q. (2018). Does size matter? Fecundity and longevity of spider mites  
435 (*Tetranychus urticae*) in relation to mating and food availability– Syst. Appl. Acarol. 23: 1796–  
436 1808.
- 437 Lima, S.L. (1998). Nonlethal Effects in the Ecology of Predator-Prey Interactions: What are the  
438 ecological effects of anti-predator decision-making?– BioScience 48: 25–34.
- 439 Macke, E., Magalhães, S., Do-Thi Khanh, H., Frantz, A., Facon, B., & Olivieri, I. (2012). Mating Modifies  
440 Female Life History in a Haplodiploid Spider Mite– Am. Nat. 179: E147–E162.
- 441 Massol, F., Calcagno, V., & Massol, J. (2009). The metapopulation fitness criterion: proof and  
442 perspectives– Theor. Popul. Biol. 75: 183–200.
- 443 McEnroe, W. D. & Dronka, K. (1966). Color vision in the adult female two-spotted spider mite–  
444 Science 154: 782–784.
- 445 McEnroe, William D. (1969). Eyes of the Female Two-Spotted Spider Mite, *Tetranychus urticae*. I.  
446 Morphology<sup>1,2</sup>– Ann. Entomol. Soc. Am. 62: 461–466.
- 447 Mery, F., Varela, S.A.M., Danchin, É., Blanchet, S., Parejo, D., Coolen, I., & Wagner, R.H. (2009). Public  
448 Versus Personal Information for Mate Copying in an Invertebrate– Curr. Biol. 19: 730–734.
- 449 Naegele, J.A., McEnroe, W.D., & Soans, A.B. (1966). Spectral sensitivity and orientation response of  
450 the two-spotted spider mite, *Tetranychus urticae* Kock, from 350 millimicron to 700  
451 millimicron– J. Insect Physiol. 12: 1187–1195.
- 452 Oku, K. (2009). Effects of density experience on mate guarding behavior by adult male Kanzawa  
453 spider mites– J. Ethol. 27: 279–283.
- 454 Oku, K. (2014). Sexual selection and mating behavior in spider mites of the genus *Tetranychus* (Acari:  
455 Tetranychidae)– Appl. Entomol. Zool. 49: 1–9.

- 456 Oku, K. (2016). Precopulatory mate guarding influences the development of quiescent deutonymph  
457 females in the two-spotted spider mite (Acari: Tetranychidae)– *Exp. Appl. Acarol.* 68: 33–38.
- 458 Oku, K. & Saito, Y. (2014). Do males evaluate female age for precopulatory mate guarding in the two-  
459 spotted spider mite?– *J. Ethol.* 32: 1–6.
- 460 Oku, K. & Shimoda, T. (2013). Indirect evidence that guarded quiescent deutonymph females invest  
461 energy to attract conspecific males in the Kanzawa spider mite (Acari: Tetranychidae)?– *Exp.*  
462 *Appl. Acarol.* 60: 445–449.
- 463 Oku, K., Weldegergis, B.T., Poelman, E.H., De Jong, P.W., & Dicke, M. (2015). Altered Volatile Profile  
464 Associated with Precopulatory Mate Guarding Attracts Spider Mite Males– *J. Chem. Ecol.* 41:  
465 187–193.
- 466 Oku, K. & Yano, S. (2008). Effects of predation risk on mating behavior of the Kanzawa spider mite– *J.*  
467 *Ethol.* 26: 261–266.
- 468 Papadopoulos, N.T., Liedo, P., Mueller, H.-G., Wang, J.-L., Molleman, F., & Carey, J.R. (2010). Cost of  
469 reproduction in male medflies: The primacy of sexual courting in extreme longevity  
470 reduction– *J. Insect Physiol.* 56: 283–287.
- 471 Parker, G.A. (1974). Courtship Persistence and Female-Guarding as Male Time Investment Strategies–  
472 *Behaviour* 48: 157–184.
- 473 Parmentier, T., De Laender, F., Wenseleers, T., & Bonte, D. (2018). Prudent behavior rather than  
474 chemical deception enables a parasite to exploit its ant host– *Behav. Ecol.* 29: 1225–1233.
- 475 Penman, D.R. & Cone, W.W. (1972). Behavior of Male Twospotted Spider Mites<sup>1</sup> in Response to  
476 Quiescent Female Deutonymphs and to Web<sup>2</sup>– *Ann. Entomol. Soc. Am.* 65: 1289–1293.
- 477 Penman, D.R. & Cone, W.W. (1974). Role of Web, Tactile Stimuli, and Female Sex Pheromone in  
478 Attraction of Male Twospotted Spider Mites<sup>1</sup> to Quiescent Female Deutonymphs<sup>2</sup>– *Ann.*  
479 *Entomol. Soc. Am.* 67: 179–182.
- 480 Potter, D.A., Wensch, D.L., & Johnston, D.E. (1976). Guarding, Aggressive Behavior, and Mating  
481 Success in Male Twospotted Spider Mites<sup>1</sup>, 2– *Ann. Entomol. Soc. Am.* 69: 707–711.

- 482 Raspotnig, G., Krisper, G., Fauler, G., & Leis, H.-J. (2008). Distinctive Cuticular Hydrocarbon Profiles in  
483 Oribatid Mites (Acari: Oribatida)– *Ann. Zool.* 58: 445–452.
- 484 Regev, S. & Cone, W.W. (1975). Evidence of Farnesol as a Male Sex Attractant of the Twospotted  
485 Spider Mite, *Tetranychus urticae* Koch (Acarina: Tetranychidae) 1– *Environ. Entomol.* 4: 307–  
486 311.
- 487 Regev, S. & Cone, W.W. (1976). Analyses of Pharate Female Twospotted Spider Mites 1 for Nerolidol  
488 and Geraniol: Evaluation for Sex 2 Attraction of Males– *Environ. Entomol.* 5: 133–138.
- 489 Regev, S. & Cone, W.W. (1980). The Monoterpene Citronellol, as a Male Sex Attractant of the  
490 Twospotted Spider Mite, *Tetranychus urticae* (Acarina: Tetranychidae) 1– *Environ. Entomol.*  
491 9: 50–52.
- 492 Rodrigues, L.R., Figueiredo, A.R.T., Varela, S.A.M., Olivieri, I., & Magalhães, S. (2017). Male spider  
493 mites use chemical cues, but not the female mating interval, to choose between mates– *Exp.*  
494 *Appl. Acarol.* 71: 1–13.
- 495 Royalty, R.N., Phelan, P.L., & Hall, F.R. (1993). Comparative effects of form, colour, and pheromone of  
496 twospotted spider mite quiescent deutonymphs on male guarding behaviour– *Physiol.*  
497 *Entomol.* 18: 303–316.
- 498 Saeki, Y., Kruse, K.C., & Switzer, P.V. (2005). Male Preference for Large Females and Female  
499 Reproductive Condition in the Japanese Beetle, *Popillia japonica* Newman (Coleoptera:  
500 Scarabaeidae)– *J. Kans. Entomol. Soc.* 78: 13–19.
- 501 Saito, Y. (2010). *Plant Mites and Sociality: Diversity and Evolution*. Springer Japan.
- 502 Scauzillo, R.C. & Ferkin, M.H. (2019). Factors that affect non-independent mate choice– *Biol. J. Linn.*  
503 *Soc.* 128: 499–514.
- 504 Schneider, C.A., Rasband, W.S., & Eliceiri, K.W. (2012). NIH Image to ImageJ: 25 years of image  
505 analysis– *Nat. Methods* 9: 671–675.
- 506 Schulz, S. & Toft, S. (1993). Identification of a Sex Pheromone from a Spider– *Science* 260: 1635–  
507 1637.

- 508 Scott, C., Gerak, C., McCann, S., & Gries, G. (2018). The role of silk in courtship and chemical  
509 communication of the false widow spider, *Steatoda grossa* (Araneae: Theridiidae)– J. Ethol.  
510 36: 191–197.
- 511 Scott, C.E., McCann, S., & Andrade, M.C.B. (2019). Male black widows parasitize mate-searching  
512 effort of rivals to find females faster– Proc. R. Soc. B Biol. Sci. 286: 20191470.
- 513 Smith, A.A. & Liebig, J. (2017). The evolution of cuticular fertility signals in eusocial insects– Curr.  
514 Opin. Insect Sci. 22: 79–84.
- 515 Snowdon, C.T. (1997). The “Nature” of Sex Differences: Myths of Male and Female– In: Fem. Evol.  
516 Biol. Boundaries Intersect. Front. (Gowaty, P.A., ed). Springer US, Boston, MA, p. 276–293.
- 517 Steiger, S. & Stökl, J. (2014). The Role of Sexual Selection in the Evolution of Chemical Signals in  
518 Insects– Insects 5: 423–438.
- 519 Tang-Martínez, Z. (2016). Rethinking Bateman’s Principles: Challenging Persistent Myths of Sexually  
520 Reluctant Females and Promiscuous Males– J. Sex Res. 53: 532–559.
- 521 Therneau, T.M., until 2009), T.L. (original S.->R port and R. maintainer, Elizabeth, A., & Cynthia, C.  
522 (2021). survival: Survival Analysis.
- 523 Thomas, M.L. & Simmons, L.W. (2010). Cuticular hydrocarbons influence female attractiveness to  
524 males in the Australian field cricket, *Teleogryllus oceanicus*– J. Evol. Biol. 23: 707–714.
- 525 Troscianko, J. (2014). A simple tool for calculating egg shape, volume and surface area from digital  
526 images– Ibis 156: 874–878.
- 527 Vahed, K. (1998). The function of nuptial feeding in insects: review of empirical studies– Biol. Rev. 73:  
528 43–78.
- 529 Van Leeuwen, T., Stillatus, V., & Tirry, L. (2004). Genetic analysis and cross-resistance spectrum of a  
530 laboratory-selected chlorfenapyr resistant strain of two-spotted spider mite (Acari :  
531 Tetranychidae)– Exp. Appl. Acarol. 32: 249–261.
- 532 Ward, P.I. (1984). *Gammarus pulex* control their moult timing to secure mates– Anim. Behav. 32:  
533 927.



- 534 Witte, K., Kniel, N., & Kureck, I.M. (2015). Mate-choice copying: Status quo and where to go– Curr.  
535 Zool. 61: 1073–1081.
- 536 Wolz, M., Klockmann, M., Schmitz, T., Pekár, S., Bonte, D., & Uhl, G. (2020). Dispersal and life-history  
537 traits in a spider with rapid range expansion– Mov. Ecol. 8: 2.
- 538 Wybouw, N., Zhurov, V., Martel, C., Bruinsma, K.A., Hendrickx, F., Grbic, V., & Van Leeuwen, T.  
539 (2015). Adaptation of a polyphagous herbivore to a novel host plant extensively shapes the  
540 transcriptome of herbivore and host– Mol. Ecol. 24: 4647–4663.
- 541
- 542
- 543
- 544
